# Supplementary material for: Reactions of proteins with a few organopalladium compounds of medicinal interest
Source: Royal Society of Chemistry journal article supplement (doi:10.1039/d2ra05332b), 2022-01-01
Supplement: d2ra05332b1.pdf [file d2ra05332b1.pdf]

# Reactions with Proteins of a few novel Organopalladium Compounds of Medicinal Interest

Lara Massai, Thomas Scattolin, Matteo Tarchi, Fabiano Visentin and Luigi Messori

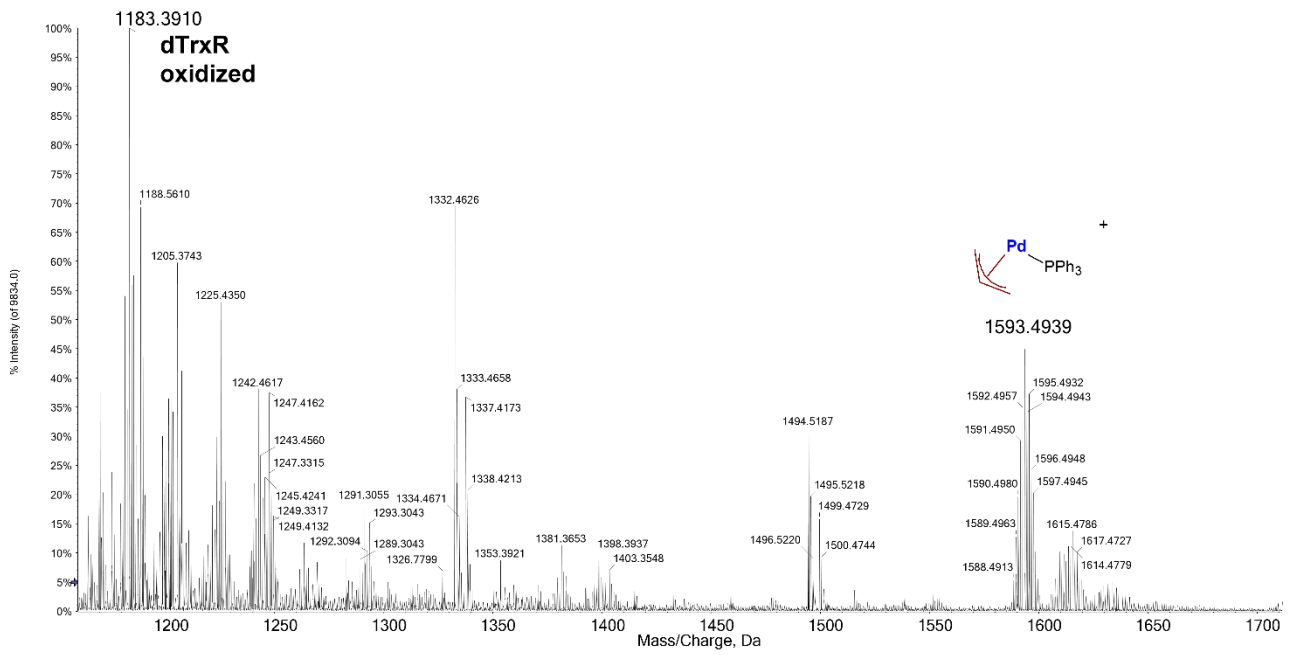

Figure S1: dTrxR\_1\_DTT\_1:3:10\_7x10-7M\_H2O\_0.1%FoA\_2h

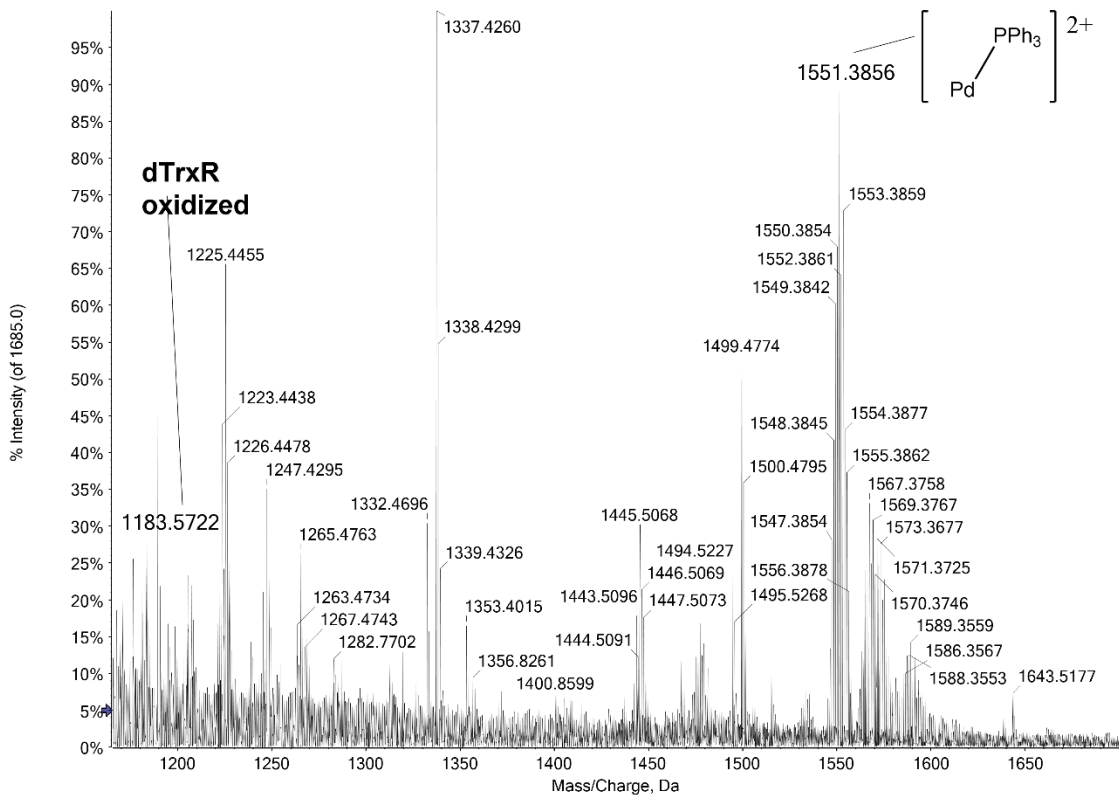

Figure S2: dTrxR\_2\_DTT\_1:3:10\_7x10-7M\_H2O\_0.1%FoA\_2h
